# Supplementary material for: Deep reconstruction of crystalline–amorphous heterojunction electrocatalysts for efficient and stable water and methanol electrolysis
Source: Royal Society of Chemistry journal article supplement (doi:10.1039/d4nr02985b), 2024-11-20
Supplement: d4nr02985b1.pdf [file d4nr02985b1.pdf]

## Supplementary Information

# Deep reconstruction of crystalline-amorphous heterojunction electrocatalysts for efficient and stable water and methanol electrolysis

*Fang Zheng<sup>a</sup>, Mayur A. Gaikwad<sup>a</sup>, Zhenhua Fang<sup>a</sup>, Suyoung Jang<sup>a</sup>, Jin Hyeok Kim<sup>a\*</sup>*

<sup>a</sup> Optoelectronics Convergence Research Center and Department of Materials Science and Engineering, Chonnam National University, Yongbong-Dong, Buk-Gu, Gwangju 61186, South Korea

Corresponding author E-mail address: [jinhyeok@chonnam.ac.kr](mailto:jinhyeok@chonnam.ac.kr)

## 1. Experimental section

### 1.1 Chemicals

Nickel foam (NF), cobalt nitrate ( $\text{Co}(\text{NO}_3)_2 \cdot 6\text{H}_2\text{O}$ ), iron nitrate ( $\text{Fe}(\text{NO}_3)_3 \cdot 9\text{H}_2\text{O}$ ), 2-methylimidazole ( $\text{C}_4\text{H}_6\text{N}_2$ ), and thioacetamide ( $\text{C}_2\text{H}_5\text{NS}$ ), ruthenium(IV) oxide ( $\text{RuO}_2$ ), activation carbon, and N-Methyl Pyrrolidone ( $\text{C}_5\text{H}_9\text{NO}$ ) were purchased from Sigma-Aldrich. All reagents did not require further purification. NF was used as a substrate, which was ultrasonically cleaned with ethanol and deionized water for 5 min, respectively.

### 1.2 Synthesis of ZIF-67

Firstly,  $\text{Co}(\text{NO}_3)_2 \cdot 6\text{H}_2\text{O}$  (0.5 mmol, 0.1455 g) was dissolved into 10 mL Milli Q distilled water (DI water) and then NF ( $4 \times 1 \text{ cm}^2$ ) immersed into solution 30 min. Then,  $\text{C}_4\text{H}_6\text{N}_2$  (4 mmol, 0.3284 g) was dissolved into 10 mL DI water and then quickly added into the above solution and kept for 2 h. Thus, ZIF-67 can be received after washing with distilled water and dried 12 h at 60 °C.

### 1.3 Synthesis of Co-Ni<sub>3</sub>S<sub>2</sub> and Ni<sub>3</sub>S<sub>2</sub>

Synthesis of Co-Ni<sub>3</sub>S<sub>2</sub> by solvothermal method using ZIF-67 as Co source. First, 0.6 g  $\text{C}_2\text{H}_5\text{NS}$  was dissolved in 60 mL ethanol and kept stirring for 10 min. Then, a piece of ZIF-67 on the NF was immersed in the above solution, and solvothermal process was performed at 120 °C for 4 h. After that, Co-Ni<sub>3</sub>S<sub>2</sub> was prepared by washing with water and drying at 50 °C. To verify that NF also participated in the reaction as a nickel source, only pure NF was added to prepare pure Ni<sub>3</sub>S<sub>2</sub> through the above method.

### 1.4 Synthesis of FeBO/Co-Ni<sub>3</sub>S<sub>2</sub>

FeBO/Co-Ni<sub>3</sub>S<sub>2</sub> heterostructure was prepared by using Co-Ni<sub>3</sub>S<sub>2</sub> as the substrate to support FeBO. First, the NF loaded with Co-Ni<sub>3</sub>S<sub>2</sub> was placed in 47.5 ml of deionized water solution containing 0.5 mmol Fe(NO<sub>3</sub>)<sub>3</sub>·9H<sub>2</sub>O. Subsequently, 2.5 ml of NaBH<sub>4</sub> solution (0.5M) was gradually added to the above solution. After reacting at room temperature for 2 h, wash with plenty of water. The final product was dried at 50 °C overnight for further characterization and catalytic activity analysis. For comparison, NF-loaded FeBO nanostructures were also prepared in the same way. The electrocatalyst loading was calculated by weighing the NF electrode before and after catalyst synthesis. In this work, the electrocatalyst loading of FeBO/Co-Ni<sub>3</sub>S<sub>2</sub> was approximately 3.8 mg cm<sup>-2</sup>.

### **1.5 Preparation of RuO<sub>2</sub> electrode**

RuO<sub>2</sub> was coated on the NF to prepare RuO<sub>2</sub> catalyst by universal approach. A total 6 mg RuO<sub>2</sub> was ultrasonically dispersed for at least 5 min in a mixture solution containing 0.16 mL of NMP and PVDP, and 1 mg Activation carbon.

### **1.6 Characterizations**

Powder X-ray diffraction (XRD) was carried out on a X'Pert PRO Multi-Purpose X-Ray Diffractometer (PANalytical) using Cu K $\alpha$  radiation. Raman spectra were studied by NRS-5100 using 532 nm laser source. Fourier transform infrared (FT-IR) were collected on a Spectrum 400. The morphology and microstructure of the prepared materials were tested by field emission scanning electron microscope (FE-SEM Gemini 500 + EDS (Oxford)) and field emission transmission electron microscope (FE-TEM, JEM-2100F, JEOL LTD). High-performance X-ray photoelectron spectroscopy (HP-XPS, K-ALPHA+) was used to characterize the elemental

information of catalysts. The electro-oxidation of methanol to formate was confirmed using  $^1\text{H}$  NMR (400 MHz) AVANCE III HD 400.

### 1.7 Electrochemical measurement

The electrochemical performance was tested at an Autolab potentiostat (CHI Instruments, USA) using a three-electrode system. Platinum electrode and Ag/AgCl electrode were used as counter electrode and reference electrode, respectively, and the as-prepared materials on NF were used as working electrode. For electrocatalytic reactions, 1 M KOH and 1 M KOH + 0.5 M methanol were employed as the electrolytes, respectively. All the electrochemical experiments were carried out in electrolyte at 25 °C. The area of the work electrode immersed in the electrolyte is  $1 \times 1 \text{ cm}^2$ . Linear sweep voltammetry (LSV) was tested at scan rate of  $1 \text{ mV s}^{-1}$ . Convert the potential measured in this work to a reversible hydrogen electrode (RHE) according to equation  $E (\text{vs. RHE}) = E (\text{vs. Ag/AgCl}) + 0.197 + 0.059 \times \text{pH}$ . The overpotential ( $\eta$ ) was calculated according to the following equation:  $\eta = E (\text{vs. RHE}) - 1.23 \text{ V}$ . Electrochemical impedance spectroscopic (EIS) was carried out using a high-performance potentiostat (Zive Potentiostat/Galvanostat/EIS, Wonatech, Republic of Korea) at a bias potential of 300 mV in the frequency range of 0.1 Hz-10000 Hz. Electrochemical active surface areas (ECSAs) were calculated based on the formula:  $\text{ECSAs} = C_{\text{dl}}/C_s$ . Among them, the double-layer capacitance ( $C_{\text{dl}}$ ) was obtained by cyclic voltammetry (CV), while for Ni-/Co-based catalysts,  $C_s$  is usually adopted at  $0.04 \text{ mF cm}^{-2}$ . CV was tested in non-Faradaic region at scan rates of 20 to  $100 \text{ mV s}^{-1}$ . The prepared electrocatalysts' long-term stability was tested using chronopotentiometry (CP) at a current density of  $10 \text{ mA cm}^{-2}$  and a measurement time of 100 or 25 h. The overall water and methanol splitting uses FeBO/Co-Ni<sub>3</sub>S<sub>2</sub> as anode and cathode.

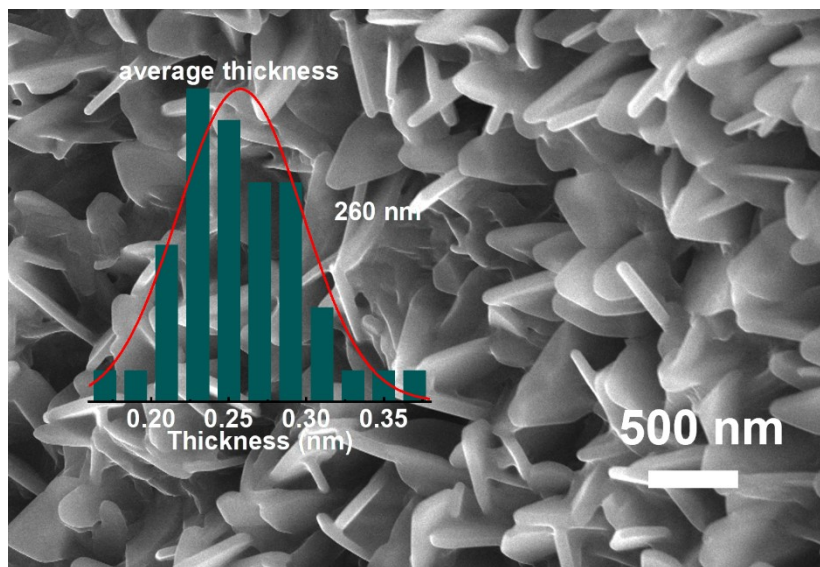

Fig. S1. FT-SEM image of ZIF-67.

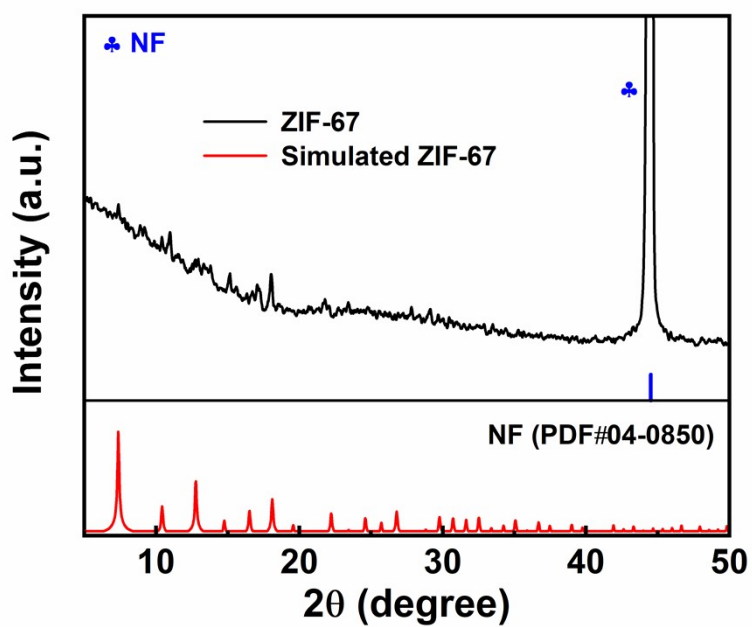

Fig. S2. XRD patterns of ZIF-67.

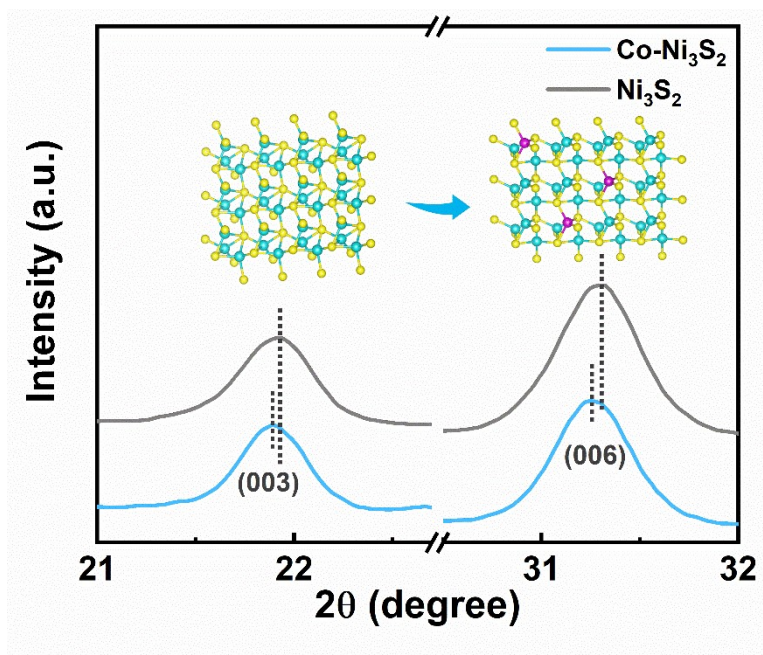

Fig. S3. Enlargement of partial XRD patterns of Co-Ni<sub>3</sub>S<sub>2</sub> and Ni<sub>3</sub>S<sub>2</sub>.

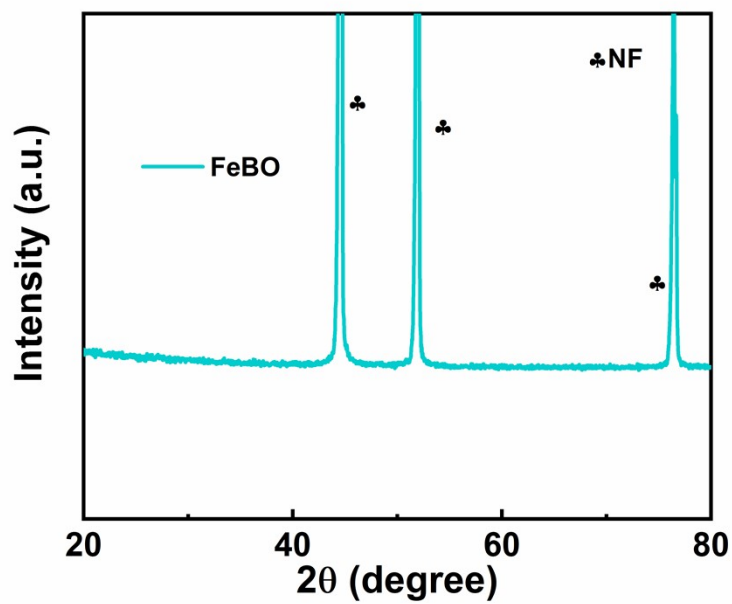

Fig. S4. XRD pattern of FeBO.

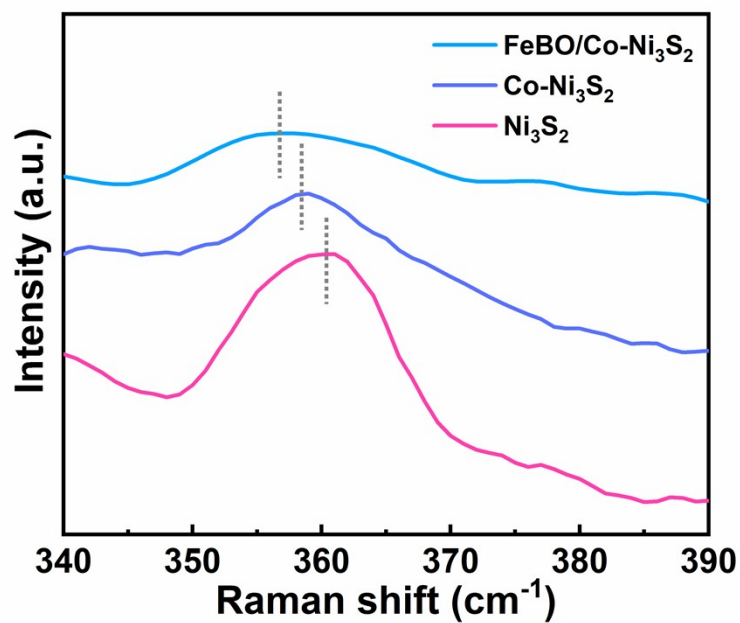

Fig. S5. Raman magnified image of FeBO/Co-Ni<sub>3</sub>S<sub>2</sub>, Co-Ni<sub>3</sub>S<sub>2</sub>, and Ni<sub>3</sub>S<sub>2</sub> samples.

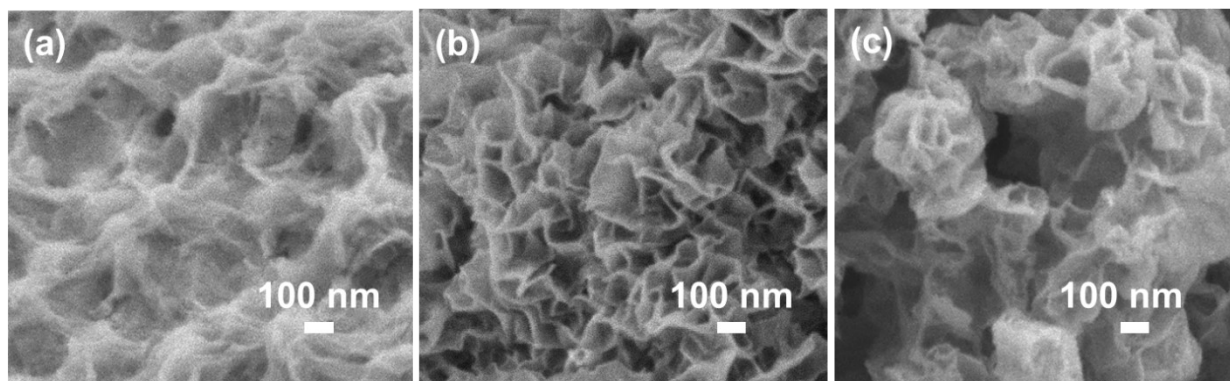

Fig. S6. FE-SEM images of (a) Ni<sub>3</sub>S<sub>2</sub>, (b) Co-Ni<sub>3</sub>S<sub>2</sub>, and (c) FeBO/Co-Ni<sub>3</sub>S<sub>2</sub>.

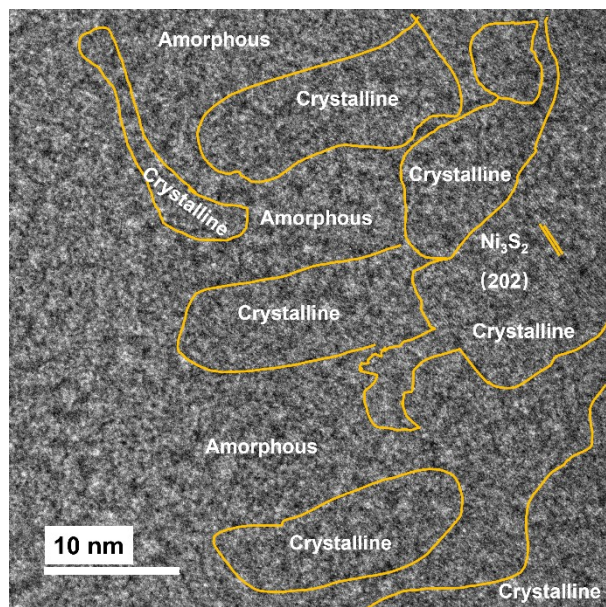

Fig. S7. HR-TEM image: the interfaces between crystalline Co-Ni<sub>3</sub>S<sub>2</sub> and amorphous FeBO are marked with the yellow lines.

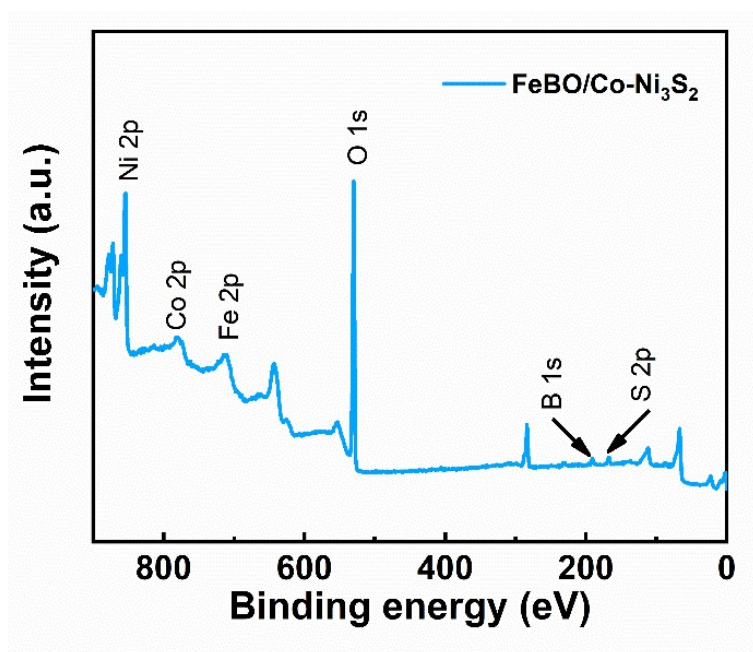

Fig. S8. XPS survey spectra of FeBO/Co-Ni<sub>3</sub>S<sub>2</sub>.



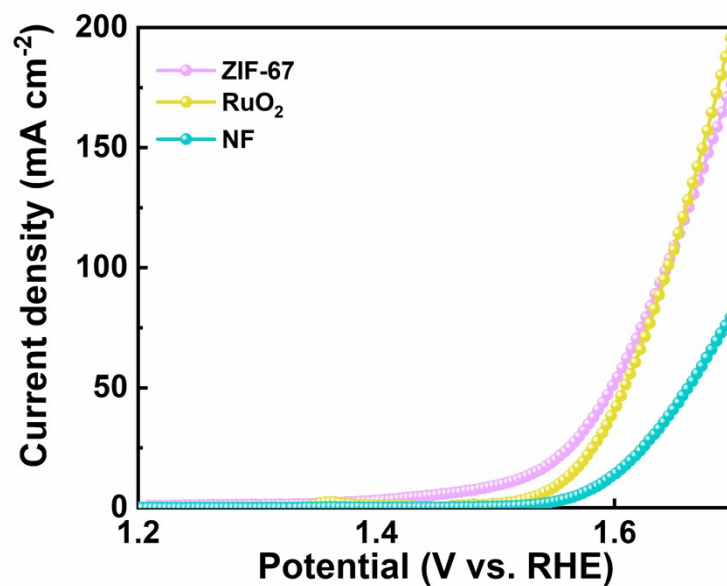

Fig. S9. LSV curves of ZIF-67, RuO<sub>2</sub> and NF for OER.

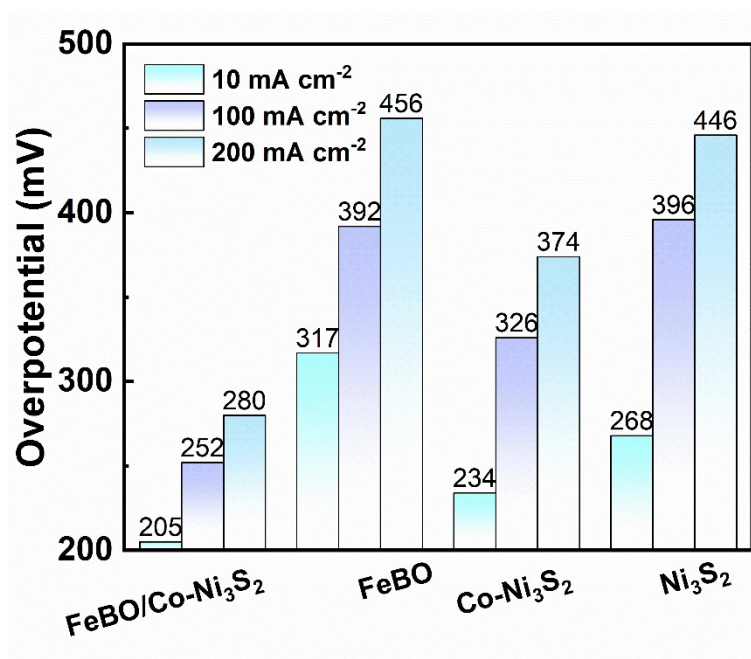

Fig. S10. Corresponding overpotentials of FeBO/Co-Ni<sub>3</sub>S<sub>2</sub>, FeBO, Co-Ni<sub>3</sub>S<sub>2</sub>, and Ni<sub>3</sub>S<sub>2</sub> samples at different current densities.

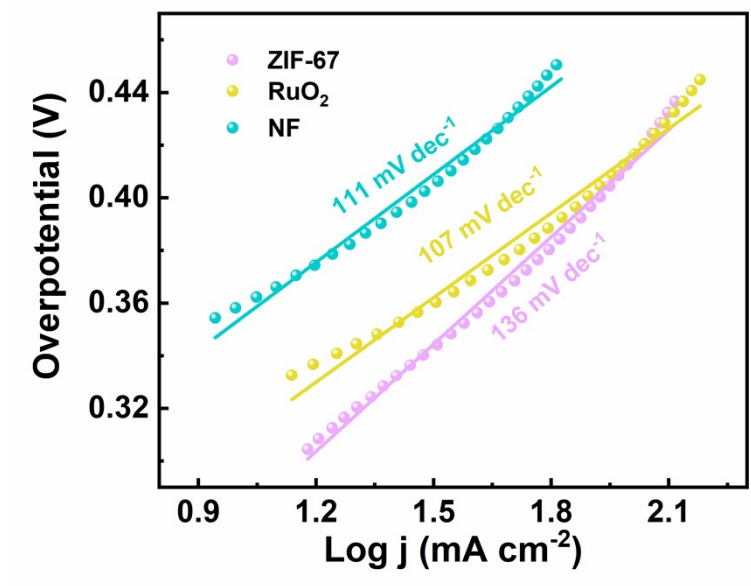

Fig. S11. Tafel slopes of ZIF-67, RuO<sub>2</sub>, and NF.

**Table S1.** Comparison of OER performance between FeBO/Co-Ni<sub>3</sub>S<sub>2</sub> and previously reported electrocatalysts using 1 M KOH as the electrolyte and NF as the substrate.

| Catalyst                                                          | Overpotential<br>(mV) @ j<br>(mAcm <sup>-2</sup> )          | Tafel slope<br>(mV.dec <sup>-1</sup> ) | Stability (h)<br>@ j (mAcm <sup>-2</sup> ) | Ref              |
|-------------------------------------------------------------------|-------------------------------------------------------------|----------------------------------------|--------------------------------------------|------------------|
| FeBO/Co-Ni <sub>3</sub> S <sub>2</sub>                            | <b>205 (η<sub>10</sub>)</b><br><b>253 (η<sub>100</sub>)</b> | <b>42</b>                              | <b>100 (η<sub>10</sub>)</b>                | <b>This work</b> |
| Fe-Ni <sub>3</sub> S <sub>2</sub> /NF                             | 214 (η <sub>10</sub> )                                      | 54                                     | 20 (η <sub>10</sub> )                      | <sup>1</sup>     |
| MoS <sub>2</sub> /Ni <sub>3</sub> S <sub>2</sub> heterostructures | 218 (η <sub>10</sub> )                                      | 76                                     | 10 (η <sub>10</sub> )                      | <sup>2</sup>     |
| MoS <sub>2</sub> -Ni <sub>3</sub> S <sub>2</sub> HNRs/NF          | 249 (η <sub>10</sub> )                                      | 57                                     | 48 (η <sub>40</sub> )                      | <sup>3</sup>     |
| Ni <sub>2</sub> P-Ni <sub>3</sub> S <sub>2</sub> HNAs/NF          | 210 (η <sub>10</sub> )                                      | 62                                     | 24 (η <sub>10</sub> )                      | <sup>4</sup>     |
| Au/Ni <sub>3</sub> S <sub>2</sub> /NF                             | 230 (η <sub>10</sub> )                                      | 51                                     | 60 (η <sub>10</sub> )                      | <sup>5</sup>     |
| NiMoS                                                             | 260 (η <sub>10</sub> )                                      | 59                                     | 15 (η <sub>120</sub> )                     | <sup>6</sup>     |
| f-NiFe-LDH-B                                                      | 209 (η <sub>10</sub> )                                      | 43.5                                   | 60 (η <sub>10</sub> )                      | <sup>7</sup>     |
| NiFeB@OCC                                                         | 255 (η <sub>20</sub> )                                      | 65                                     | 24 (η <sub>100</sub> )                     | <sup>8</sup>     |
| Fe-doped Ni <sub>3</sub> S <sub>2</sub> /rGO@NF                   | 247 (η <sub>20</sub> )                                      | 63                                     | 20 (η <sub>20</sub> )                      | <sup>9</sup>     |

**Table S2.** Values of R<sub>s</sub> and R<sub>ct</sub> in the samples for OER.

| Sample                                 | R <sub>s</sub> (Ω) | R <sub>ct</sub> (Ω) |
|----------------------------------------|--------------------|---------------------|
| FeBO/Co-Ni <sub>3</sub> S <sub>2</sub> | 0.305              | 0.108               |
| FeBO                                   | 0.283              | 163                 |
| Co-Ni <sub>3</sub> S <sub>2</sub>      | 0.302              | 1.14                |
| Ni <sub>3</sub> S <sub>2</sub>         | 0.477              | 20.3                |

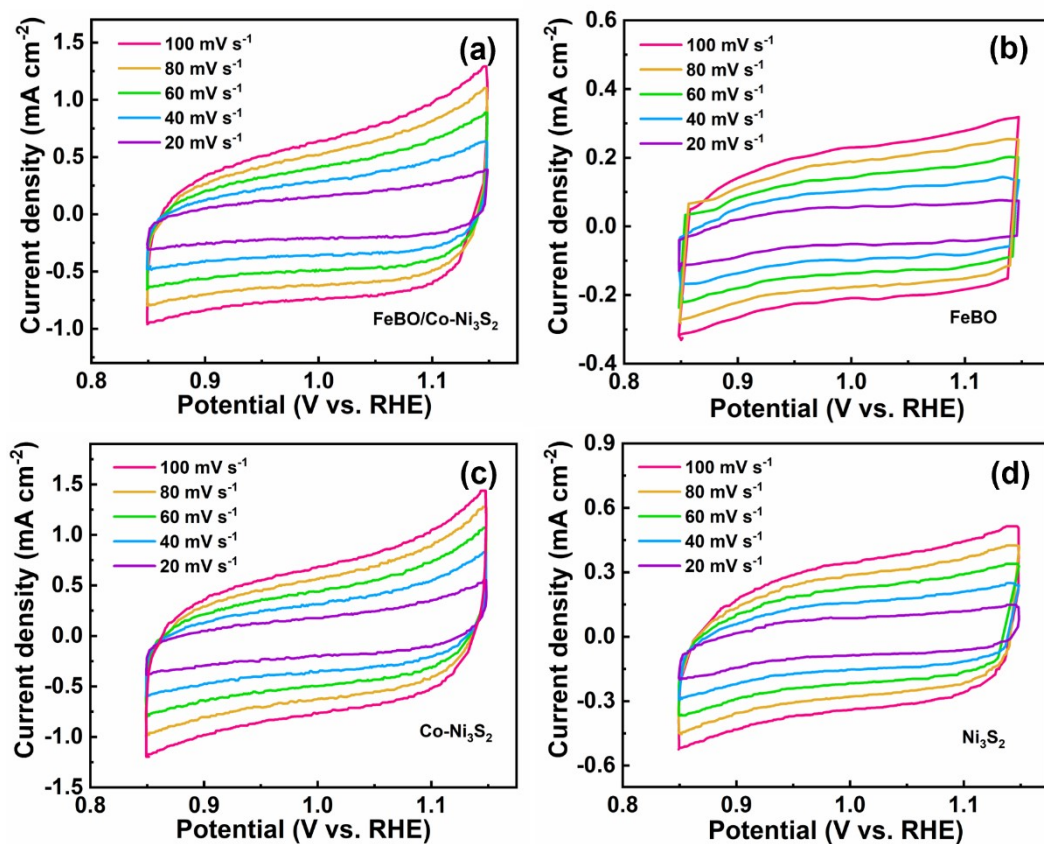

Fig. S12. The CV curves of (a) FeBO/Co-Ni<sub>3</sub>S<sub>2</sub>, (b) FeBO, (c) Co-Ni<sub>3</sub>S<sub>2</sub>, and (d) Ni<sub>3</sub>S<sub>2</sub>. All the curves were tested at different scan rates: 20, 40, 60, 80 and 100 mV s<sup>-1</sup>.

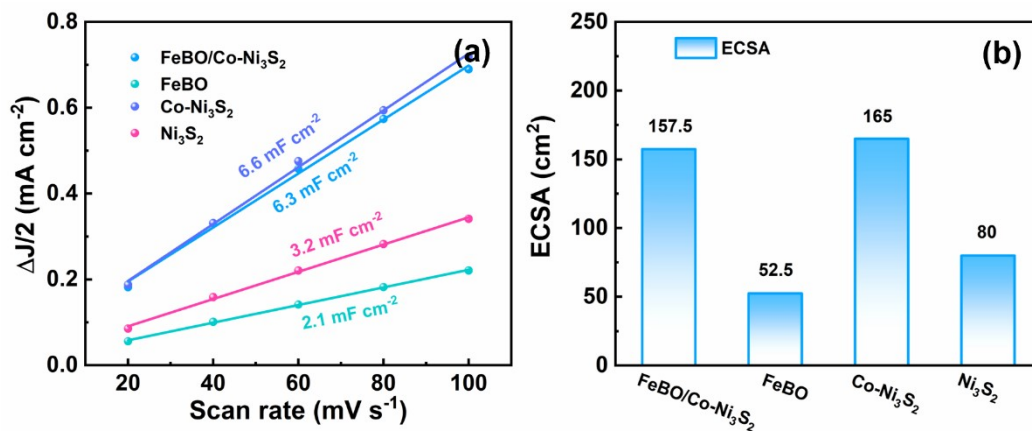

Fig. S13. The  $C_{dl}$  and ECSA values of the samples.

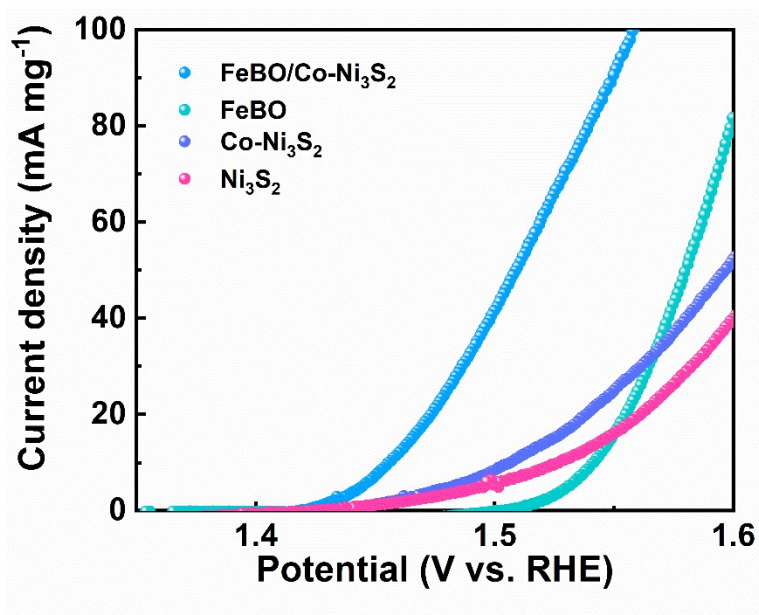

Fig. S14. The LSV curves normalized by mass.

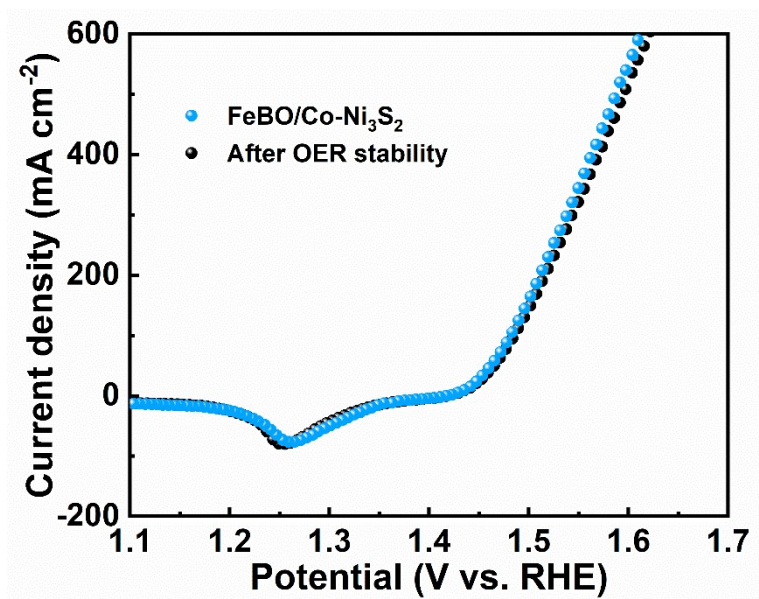

Fig. S15. The LSV curves before and after long-term stability.

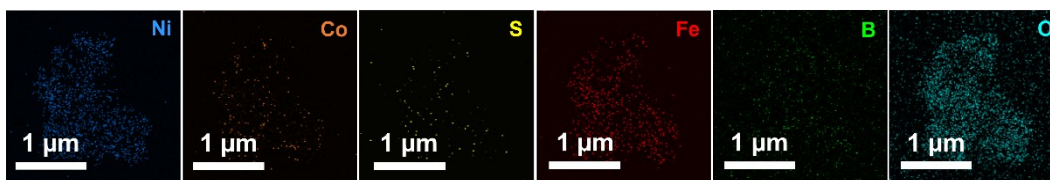

Fig. S16. The elemental mapping images of FeBO/Co-Ni<sub>3</sub>S<sub>2</sub> after the OER stability test.

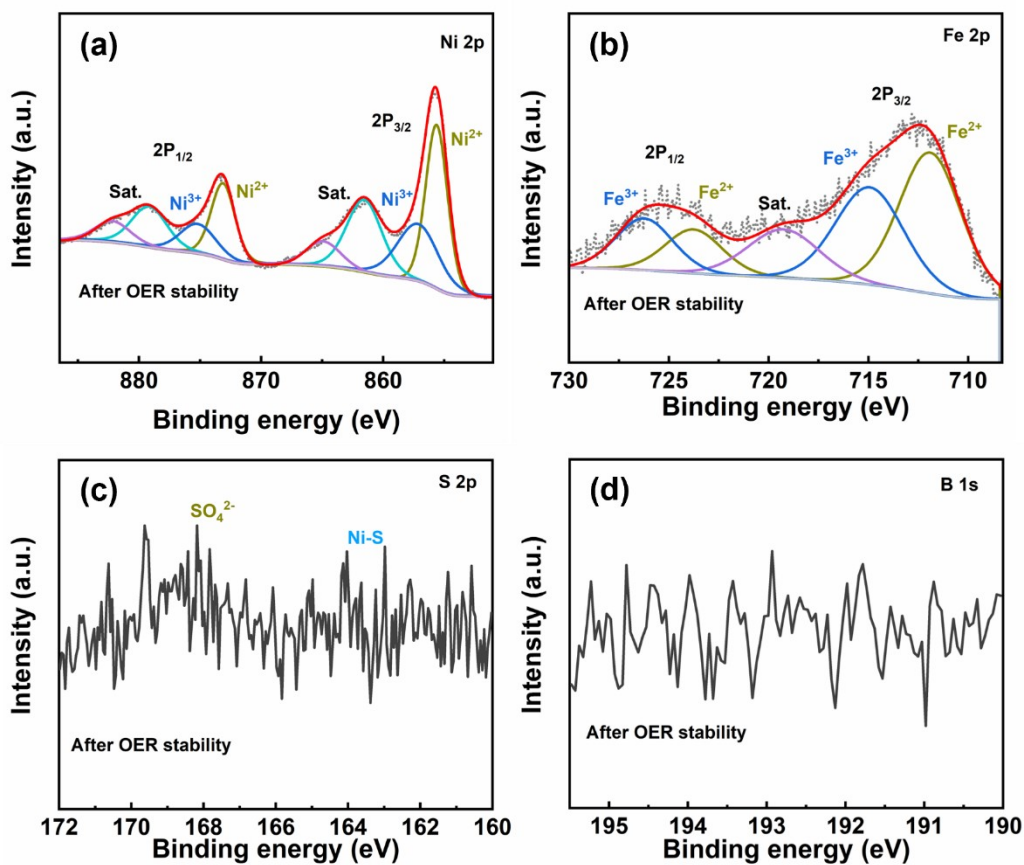

Fig. S17. Fig. XPS spectrum of FeBO/Co-Ni<sub>3</sub>S<sub>2</sub> before and after stability test, (a) Ni 2p; (b) Fe 2p; (c) S 2p; and (d) B 1s.

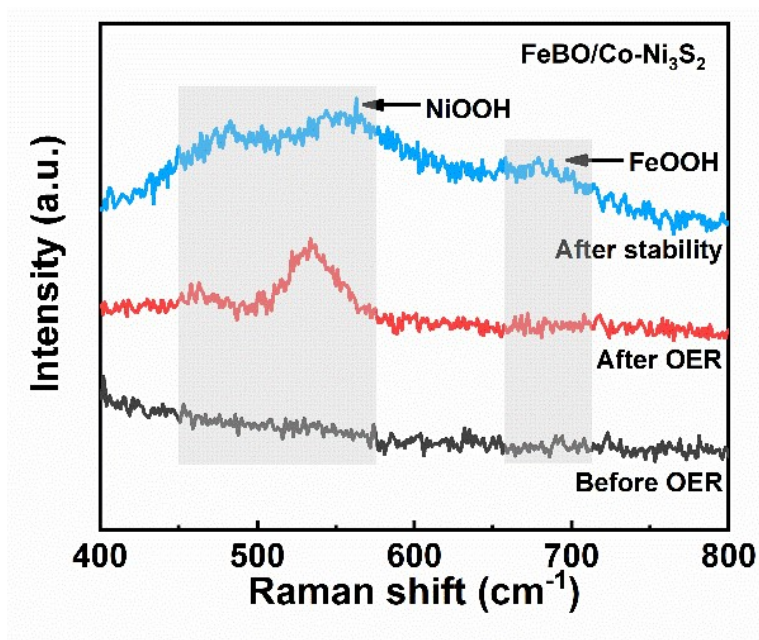

Fig. S18. Comparison of Raman spectra of FeBO/Co-Ni<sub>3</sub>S<sub>2</sub> before, after OER, and after stability.

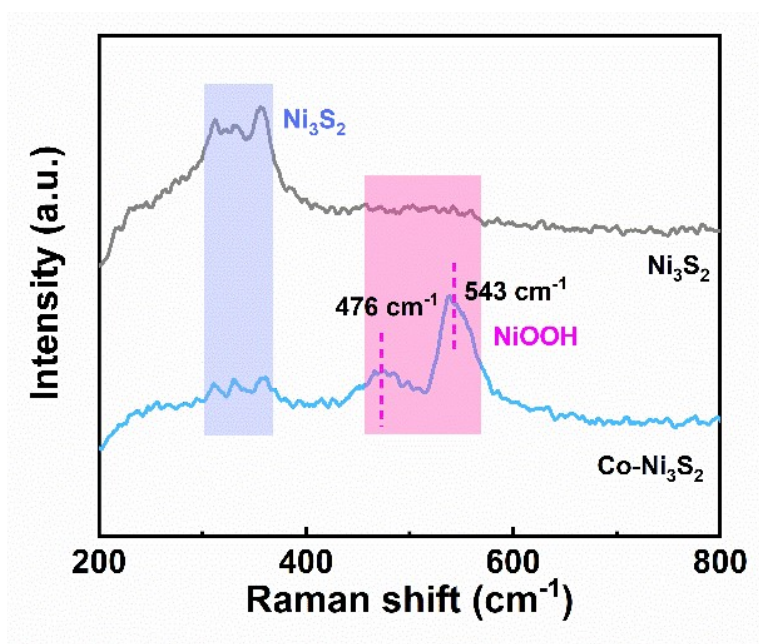

Fig. 19. Raman spectra of Co-Ni<sub>3</sub>S<sub>2</sub>, and Ni<sub>3</sub>S<sub>2</sub> catalysts after OER test.

**Table S3.** Values of  $R_s$  and  $R_{ct}$  in the samples for MOR.

| Sample                                 | $R_s$ ( $\Omega$ ) | $R_{ct}$ ( $\Omega$ ) |
|----------------------------------------|--------------------|-----------------------|
| FeBO/Co-Ni <sub>3</sub> S <sub>2</sub> | 0.334              | 0.047                 |
| FeBO                                   | 0.334              | 1.28                  |
| Co-Ni <sub>3</sub> S <sub>2</sub>      | 0.385              | 0.874                 |
| Ni <sub>3</sub> S <sub>2</sub>         | 0.509              | 0.245                 |



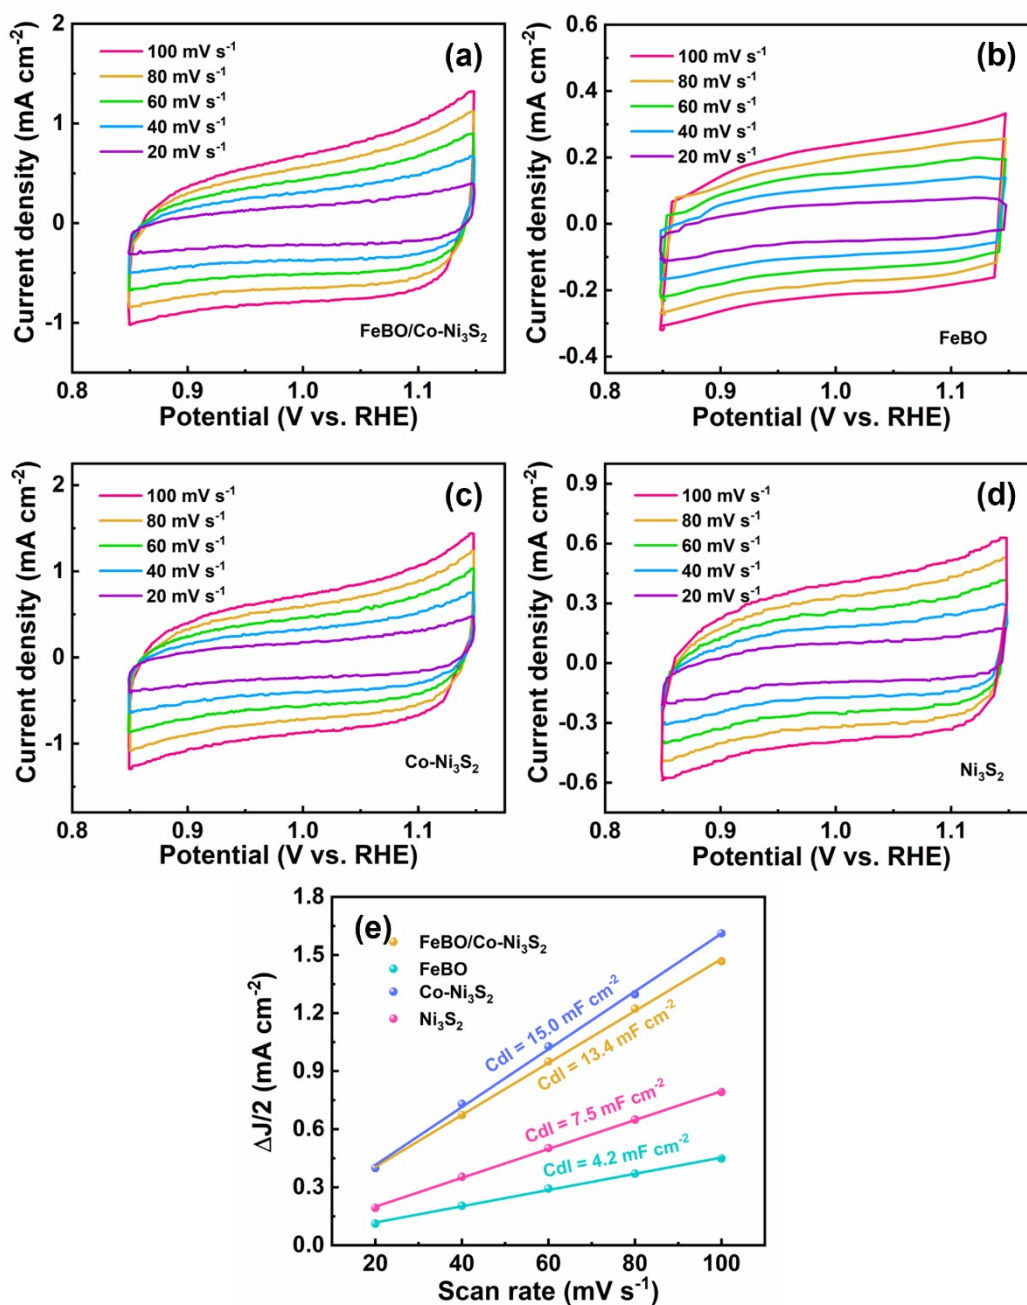

Fig. S20. CV curves of (a) FeBO/Co-Ni<sub>3</sub>S<sub>2</sub>, (b) FeBO, (c) Co-Ni<sub>3</sub>S<sub>2</sub>, and (d) Ni<sub>3</sub>S<sub>2</sub> at different scan rates for MOR testing. (e)  $C_{dl}$  values.

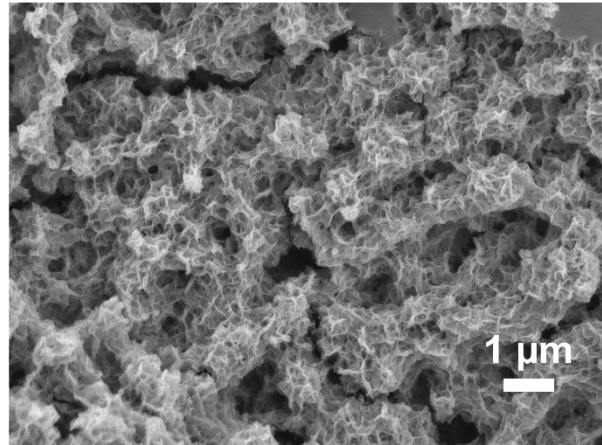

Fig. S21. The FE-SEM image of FeBO/Co-Ni<sub>3</sub>S<sub>2</sub> after the MOR stability test.

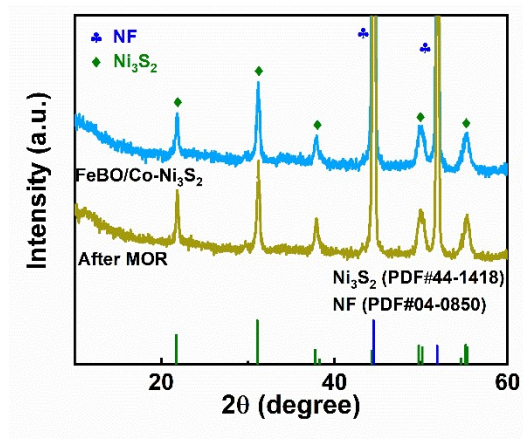

Fig. S22. The XRD image of FeBO/Co-Ni<sub>3</sub>S<sub>2</sub> after the MOR stability test.

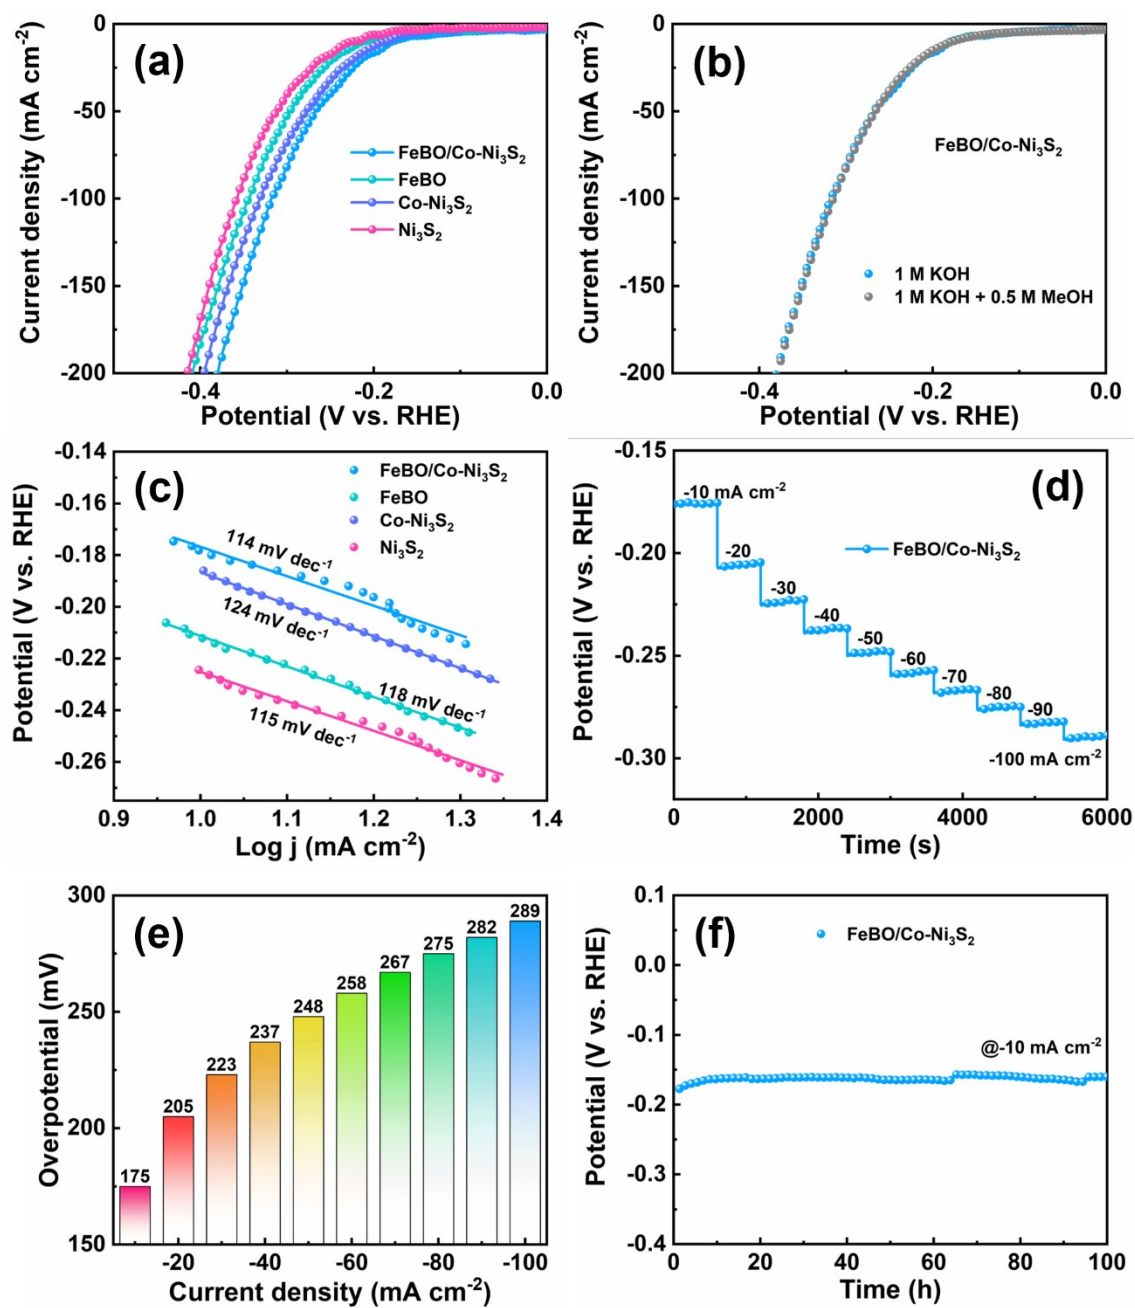

Fig. S23. (a) The LSV curves for the HER of various catalysts; (b) HER polarization plots of FeBO/Co-Ni<sub>3</sub>S<sub>2</sub> in 1 M KOH electrolyte with and without 0.5 M methanol; (c) Tafel slopes for HER; (d) multi-current process of FeBO/Co-Ni<sub>3</sub>S<sub>2</sub> and (e) corresponding overpotentials; (f) Long-term stability testing of HER.

**Table S4.** Comparison of the water and methanol electrolysis performance of FeBO/Co-Ni<sub>3</sub>S<sub>2</sub> with previous.

| Catalyst                                         | Voltage<br>(V) @ j (mAcm <sup>-2</sup> )                      |                                                               | Stability (h)<br>@10 j (mAcm <sup>-2</sup> ) |           | Ref.             |
|--------------------------------------------------|---------------------------------------------------------------|---------------------------------------------------------------|----------------------------------------------|-----------|------------------|
|                                                  | OVS                                                           | OMS                                                           | OVS                                          | OMS       |                  |
| <b>FeBO/Co-Ni<sub>3</sub>S<sub>2</sub></b>       | <b>1.58 (η<sub>10</sub>)</b><br><b>1.86 (η<sub>100</sub>)</b> | <b>1.44 (η<sub>10</sub>)</b><br><b>1.67 (η<sub>100</sub>)</b> | <b>100</b>                                   | <b>25</b> | <b>This work</b> |
| Pt-Ni <sub>3</sub> S <sub>2</sub>                | 1.886 (η <sub>100</sub> )                                     | 1.71 (η <sub>10</sub> )                                       | -                                            | 36        | 10               |
| Ni <sub>3</sub> S <sub>2</sub> /MoS <sub>2</sub> | 1.62 (η <sub>10</sub> )                                       | -                                                             | 100                                          | -         | 11               |
| Ni <sub>3</sub> S <sub>2</sub> @G                | 1.66 (η <sub>10</sub> )                                       | -                                                             | 30                                           | -         | 12               |
| 3DG-Au-Ni <sub>3</sub> S <sub>2</sub>            | 1.63 (η <sub>10</sub> )                                       | -                                                             | 19                                           | -         | 13               |
| Ni <sub>3</sub> S <sub>2</sub> @Ni               | 1.61 (η <sub>10</sub> )                                       | -                                                             | 30                                           | -         | 14               |
| Ni-Co-S HPNA                                     | 1.62 (η <sub>10</sub> )                                       | -                                                             | 24                                           | -         | 15               |
| FeNi@FeNiB-700                                   | 1.65 (η <sub>10</sub> )                                       | -                                                             | 12                                           | -         | 16               |
| Fe <sub>1</sub> Mn <sub>1</sub> @BN-PCFs         | 1.622 (η <sub>10</sub> )                                      | -                                                             | 30                                           | -         | 17               |
| Co-S-INF                                         | 1.82 (η <sub>100</sub> )                                      | 1.70 (η <sub>100</sub> )                                      | 27                                           | 27        | 18               |
| Co-Rh <sub>2</sub>                               | -                                                             | 1.545 (η <sub>10</sub> )                                      | -                                            | 4         | 19               |
| NiTe <sub>2</sub> /Ni                            | 1.77 (η <sub>10</sub> )                                       | 1.54 (η <sub>10</sub> )                                       | 12                                           | 12        | 20               |
| Co(OH) <sub>2</sub> @HOS/CP                      | 1.631 (η <sub>10</sub> )                                      | 1.497 (η <sub>10</sub> )                                      | -                                            | 20        | 21               |

The H<sub>2</sub> yield is calculated using the formula, H<sub>2</sub> yield rate = (V(experimental)/V(theoretical)) × 100%. The theoretical amount of H<sub>2</sub> released (V(theoretical)), is calculated using Faraday's law:

$$V_{Theo} = IRTt/PzF$$

V<sub>Theo</sub> = Theoretical volume of evolved gas

I is working current density (I = 100 mA cm<sup>-2</sup>)

T is working temperature (T = 298 K), and 't' is time interval (t = 1200, 2400, and 3600 s)

R is the gas constant (R = 8.314459), and 'P' is the working pressure (P = 101.3 Kpa)

F is the Faraday's constant (F = 96485 C)

z is the number of electrons for generating 1 mol H<sub>2</sub> (z = 2)

The actual amount of H<sub>2</sub> produced during the electrolysis process was collected using a homemade H-type water electrolysis device in the laboratory and a water displacement method. Electrolysis conditions: The electrolysis was carried out in a two-electrode electrolytic cell with FeBO/Co-Ni<sub>3</sub>S<sub>2</sub> electrodes and a controlled current density (100 mA cm<sup>-2</sup>) for 1 h, where 1 M KOH and 1 M KOH + 0.5 M MeOH were used as electrolytes. The H<sub>2</sub> production results are visually represented in Fig. S24 and S25.

H<sub>2</sub> yield rate was calculated using the following equation:

$$\text{H}_2 \text{ yield rate} = Vg(\text{experimental})/Vg(\text{theoretical}) \times 100\%.$$

The H<sub>2</sub> yield rate of the two-electrode system is shown in Table S5.

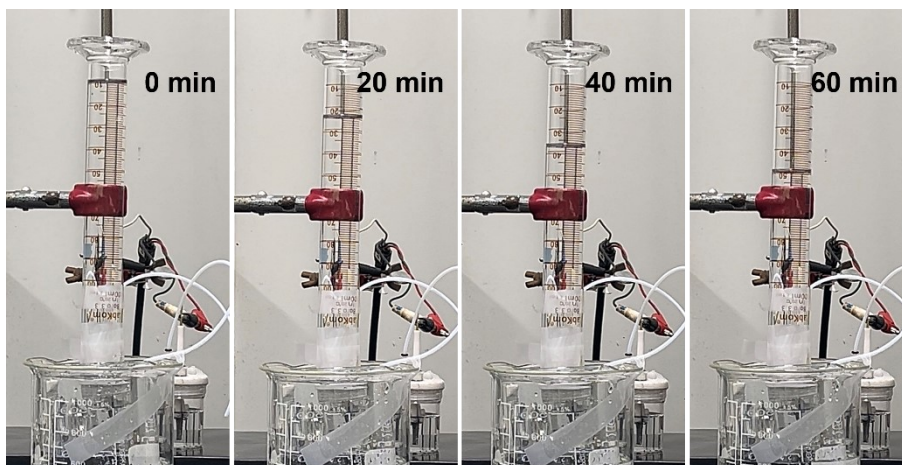

Fig. S24. The HER/OER dual-electrode system expands the drainage device during H<sub>2</sub> collection at different intervals.

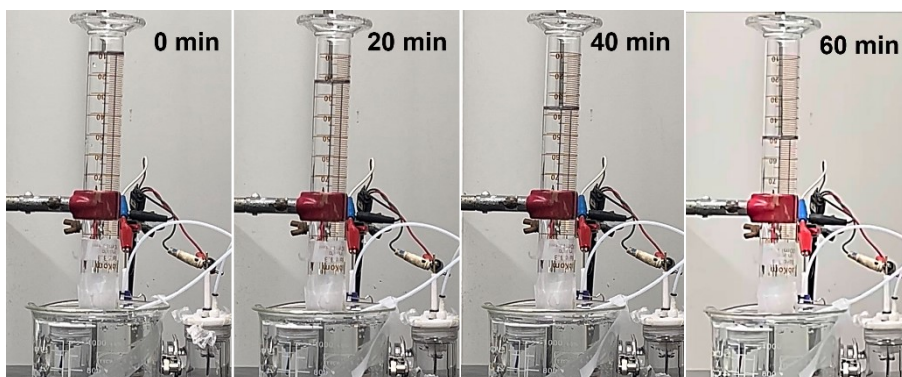

Fig. S25. The HER/MOR dual-electrode system expands the drainage device during H<sub>2</sub> collection at different intervals.

Table S5. The H<sub>2</sub> yield rate of the two-electrode systems.

| Time \ System | H <sub>2</sub> yield rate |         |
|---------------|---------------------------|---------|
|               | HER/OER                   | HER/MOR |
| 20 min        | 99%                       | 95%     |
| 40 min        | 92%                       | 92%     |
| 60 min        | 88%                       | 89%     |
| Average       | 93%                       | 92%     |

## References

1. G. Zhang, Y. S. Feng, W. T. Lu, D. He, C. Y. Wang, Y. K. Li, X. Y. Wang and F. F. Cao, *Acs Catalysis*, 2018, **8**, 5431-+.
2. J. Zhang, T. Wang, D. Pohl, B. Rellinghaus, R. H. Dong, S. H. Liu, X. D. Zhuang and X. L. Feng, *Angewandte Chemie-International Edition*, 2016, **55**, 6702-6707.
3. Y. Q. Yang, K. Zhang, H. L. Ling, X. Li, H. C. Chan, L. C. Yang and Q. S. Gao, *Acs Catalysis*, 2017, **7**, 2357-2366.
4. L. Y. Zeng, K. A. Sun, X. B. Wang, Y. Q. Liu, Y. Pan, Z. Liu, D. W. Cao, Y. Song, S. H. Liu and C. G. Liu, *Nano Energy*, 2018, **51**, 26-36.
5. H. Liu, J. N. Cheng, W. J. He, Y. Li, J. Mao, X. R. Zheng, C. Chen, C. X. Cui and Q. Y. Hao, *Applied Catalysis B-Environment and Energy*, 2022, **304**, 120935.
6. C. Z. Wang, X. D. Shao, J. Pan, J. G. Hu and X. Y. Xu, *Applied Catalysis B-Environmental*, 2020, **268**, 118435.
7. S. F. Zhou, H. W. He, J. Li, Z. H. Ye, Z. Liu, J. W. Shi, Y. Hu and W. W. Cai, *Advanced Functional Materials*, 2023, **34**, 2313770.
8. A. Kafle, D. Gupta and T. C. Nagaiah, *Electrochimica Acta*, 2023, **441**, 141779.
9. D. M. Shao, P. W. Li, R. Z. Zhang, C. H. Zhao, D. Q. Wang and C. J. Zhao, *International Journal of Hydrogen Energy*, 2019, **44**, 2664-2674.
10. Q. Q. Zhao, B. Zhao, X. Long, R. F. Feng, M. Shakouri, A. Paterson, Q. F. Xiao, Y. Zhang, X. Z. Fu and J. L. Luo, *Nano-Micro Letters*, 2024, **16**, 80.
11. S. Kim, K. Min, H. Kim, R. Yoo, S. E. Shim, D. Lim and S. H. Baeck, *International Journal of Hydrogen Energy*, 2022, **47**, 8165-8176.



12. J. Yu, Y. Du, Q. Q. Li, L. Zhen, V. P. Dravid, J. S. Wu and C. Y. Xu, *Applied Surface Science*, 2019, **465**, 772-779.
13. H. C. Tsai, B. Vedhanarayanan and T. W. Lin, *Acs Applied Energy Materials*, 2019, **2**, 3708-3716.
14. B. X. Wu, H. Qian, Z. W. Nie, Z. P. Luo, Z. X. Wu, P. Liu, H. He, J. H. Wu, S. G. Chen and F. F. Zhang, *Journal of Energy Chemistry*, 2020, **46**, 178-186.
15. W. X. Chen, Y. W. Zhang, G. L. Chen, R. Huang, Y. J. Wu, Y. M. Zhou, Y. J. Hu and K. Ostrikov, *Journal of Colloid and Interface Science*, 2020, **560**, 426-435.
16. H. F. Yuan, S. M. Wang, X. D. Gu, B. Tang, J. P. Li and X. G. Wang, *Journal of Materials Chemistry A*, 2019, **7**, 19554-19564.
17. Z. Liu, F. Guo, L. Cheng, X. J. Bo, T. T. Liu and M. A. Li, *Journal of Colloid and Interface Science*, 2023, **629**, 179-192.
18. J. X. Dang, G. M. Chen, B. E. Yuan, F. Y. Liu, Q. Wang, F. Wang, H. Miao and J. L. Yuan, *Nanoscale*, 2024, **16**, 4710-4723.
19. Y. Guo, X. B. Yang, X. C. Liu, X. L. Tong and N. J. Yang, *Advanced Functional Materials*, 2023, **33**, 2209134.
20. S. Anantharaj, M. C. Li, R. Arulraj, K. Eswaran, C. M. S. Fidha, R. Murugesan, A. Maruthapillai and S. Noda, *Chemical Communications*, 2023, **59**, 12755-12758.
21. K. Xiang, D. Wu, X. H. Deng, M. Li, S. Y. Chen, P. P. Hao, X. F. Guo, J. L. Luo and X. Z. Fu, *Advanced Functional Materials*, 2020, **30**, 1909610.
